# Supplementary material for: An Immune Response Network Associated with Blood Lipid Levels
Source: PLoS Genet. 2010 Sep 9;6(9):e1001113. doi: 10.1371/journal.pgen.1001113 (PMC2936545; doi:10.1371/journal.pgen.1001113)
Supplement: Table S4 — Trans expression quantitative trait loci in the LL module. (0.02 MB XLS) [file pgen.1001113.s010.xls]

## Sheet: Sheet1
Gene	Probe chr	Probe position	SNP	Coded allele	SNP chr	SNP position	P value	Rho	LL association P	LL association F statistic
MS4A3	11	59594851	rs10455501	A	6	89856456	3.89541e-07	0.22	0.008769	1.69044
MS4A3	11	59594851	rs6938490	A	6	89862949	4.21323e-07	-0.22	0.003893	1.79393
MS4A3	11	59594851	rs765798	C	6	89837202	4.34463e-07	0.22	0.0008456	2.94912
